# 1 **Hierarchy of transcriptomic specialization across human** 2 **cortex captured by myelin map topography**

3

4 Joshua B. Burt<sup>1</sup>, Murat Demirtaş<sup>2</sup>, William J. Eckner<sup>1</sup>, Natasha M. Navejar<sup>3</sup>, Jie Lisa Ji<sup>4</sup>,  
5 William J. Martin<sup>5</sup>, Alberto Bernacchia<sup>6</sup>, Alan Anticevic<sup>2</sup> & John D. Murray<sup>1,2</sup>

6 <sup>1</sup>*Department of Physics, Yale University, New Haven, CT*

7 <sup>2</sup>*Department of Psychiatry, Yale University School of Medicine, New Haven, CT*

8 <sup>3</sup>*Tulane University, New Orleans, LA*

9 <sup>4</sup>*Interdepartmental Neuroscience Program, Yale University, New Haven, CT*

10 <sup>5</sup>*BlackThorn Therapeutics*

11 <sup>6</sup>*University of Cambridge, Cambridge, United Kingdom*

12 Hierarchy provides a unifying principle for the macroscale organization of anatom-  
13 ical<sup>1-4</sup> and functional<sup>5-8</sup> properties across primate cortex, yet the microscale bases of  
14 hierarchical specialization across human cortex are poorly understood. Anatomical hi-  
15 erarchy is conventionally informed by invasively measured laminar patterns of long-  
16 range cortico-cortical projections<sup>1-4</sup>, creating the need for a principled proxy measure  
17 of hierarchy in humans. Moreover, cortex exhibits a transcriptional architecture char-  
18 acterized by distinct profiles of gene expression across areas<sup>9-12</sup>, yet organizing prin-  
19 ciples for areal transcriptomic specialization remain unclear. We hypothesized that  
20 functional specialization of human cortical microcircuitry across areas involves hierar-  
21 chical gradients of gene expression. Here we show that a noninvasive neuroimaging  
22 measure, the MRI-derived myelin map<sup>13</sup>, indexes the anatomical hierarchy and closely  
23 resembles the dominant areal pattern of transcriptomic variation across the human cor-  
24 tex. We found strong hierarchical gradients in expression of genes related to cortical  
25 microcircuit function, which we validated with microanatomical data from monkey  
26 cortex, and in expression of genes related to neuropsychiatric disorders. These find-  
27 ings establish hierarchy as a general organizing principle, defining an axis shared by  
28 the transcriptomic and anatomical architectures of human cortex, and suggest that hi-  
29 erarchical gradients of microscale properties shape the macroscale specialization of  
30 cortical function.

31 Anatomical hierarchy is defined as a globally consistent ordering of cortical areas  
32 constrained by characteristic laminar patterns of interareal projections, which have been  
33 extensively measured in nonhuman primates<sup>1-3</sup>. The invasive anatomical tract-tracing  
34 techniques necessary to conventionally index hierarchy have precluded analogous in-  
35 vestigations of cortical organization in humans. We therefore first sought to establish a  
36 noninvasive neuroimaging measure that can serve as a proxy for anatomical hierarchy  
37 in human and nonhuman primate cortex. One candidate we identified was the cortical  
38 myelin map, which can be defined from structural MRI as the contrast ratio of T1- to T2-  
39 weighted (T1w/T2w) maps<sup>13</sup>. The myelin map provides a noninvasive *in vivo* measure of  
40 gray-matter intracortical myelin content and reflects borders between cytoarchitecturally  
41 delineated cortical areas<sup>13</sup>. Myelin map values are high in primary sensory cortex (vi-  
42 sual, somatosensory, auditory) and low in association cortex, homologously in human  
43 and macaque (Fig. 1a–c, Extended Data Fig. 1). Motivated by these empirical observa-  
44 tions, we hypothesized that the myelin map provides a noninvasive proxy for cortical  
45 areas' positions along the hierarchy through an inverse relationship.

46 We can quantitatively validate this proxy measure in macaque cortex through anatom-  
47 ical tract-tracing data of interareal projections with laminar specificity<sup>3</sup>. Laminar connec-  
48 tivity data are used to specify a hierarchical ordering of cortical areas such that lower  
49 areas send feedforward projections to higher areas, and higher areas send feedback pro-

50 jections to lower areas<sup>1-3,14</sup> (Extended Data Fig. 2). Feedforward and feedback projections  
51 primarily originate from the supragranular and infragranular layers, respectively. At the  
52 level of individual projections, we found that the difference in myelin map values be-  
53 tween connected areas is correlated with the laminar feedforward/feedback structure of  
54 the connection (Fig. 1d). Globally, we found a strong negative correlation between hier-  
55 archy and myelin map values ( $r_s = -0.76$ ,  $P < 10^{-5}$ ; Spearman rank correlation) (Fig.  
56 1e,f). The myelin map was more predictive of hierarchy than were two other candidate  
57 neuroimaging measures<sup>15</sup>, cortical thickness and distance from primary visual cortex (Ex-  
58 tended Data Fig. 3). The strong inverse relationship supports the cortical myelin map as  
59 a noninvasive proxy measure for hierarchy which can be applied to human cortex where  
60 lack of tract-tracing data prevents direct characterization of hierarchy.

61 The organizing principles for the large-scale structure of microcircuit specialization  
62 across human cortical hierarchy remain unclear. The study of the molecular composition  
63 of cortical microcircuitry has been revolutionized by large-scale transcriptomics, which  
64 can map expression levels of genes involved in neurobiological processes<sup>9-11</sup>. Datasets  
65 such as the Allen Human Brain Atlas (AHBA) have revealed a transcriptomic architec-  
66 ture with distinct gene expression profiles across areas of the human brain<sup>9,10,12</sup>. To test  
67 for hierarchical microcircuit specialization across human cortex, we examined areal pat-  
68 terns of cortical gene expression from the AHBA in relation to the myelin map. Due to

69 the strong inverse relationship observed between the myelin map and hierarchy, if the  
70 spatial pattern of gene expression is negatively correlated with the myelin map, then  
71 expression level increases along anatomical hierarchy; conversely, a positive correlation  
72 indicates decreasing expression along hierarchy. To support the validity of interpreta-  
73 tions, we compared the myelin map correlation (MMC) of microcircuitry-related genes  
74 in human cortex to more direct anatomical measures in macaque cortex, with focus on  
75 cytoarchitecture, inhibitory interneuron densities, and synaptic processes (Fig. 2).

76 An established feature of microcircuit specialization that varies along cortical hier-  
77 archy is the degree of laminar differentiation in cytoarchitecture<sup>4</sup>: primary sensory cortex  
78 is highly laminated with a well-defined granular layer, whereas association cortex is char-  
79 acterized by decreasing laminar differentiation and a gradual loss of the granular layer  
80 with progression along hierarchy. In macaque cortex, we found a very strong correlation  
81 between myelin map and cytoarchitectural type<sup>4</sup> (Fig. 2a). In human cortex, we exam-  
82 ined average expression profiles of genes reported to be preferentially expressed in spe-  
83 cific cortical layers<sup>16</sup>. Consistent with trends observed in macaque, we found a positive  
84 MMC for granular (L4) layer-specific genes, and negative MMCs for supra- (L1–3) and  
85 infra-granular (L5/6) layer-specific genes (Fig. 2b,c). These findings demonstrate that  
86 the noninvasive myelin map captures anatomical gradients related to cortical hierarchy  
87 in humans and nonhuman primates.

88 To gain further insight into microcircuit bases of hierarchical specialization, we ex-  
89 amined the spatial distributions of markers for distinct inhibitory interneuron cell types.  
90 Inhibitory interneuron cell types are biophysically distinct classes which differ in their  
91 synaptic connectivity patterns, morphology, electrophysiology, and functional roles<sup>17</sup>. In  
92 macaque cortex, we found that densities of parvalbumin- and calretinin-expressing in-  
93 terneurons exhibit positive and negative MMCs, respectively (Fig. 2d). In human cortex,  
94 we found highly consistent gradients in the expression profiles for the genes which code  
95 for parvalbumin and calretinin (Fig. 2e). Strong hierarchical gradients were observed  
96 in transcriptional markers for a number of inhibitory interneuron cell types<sup>17</sup> (Fig. 2f), as  
97 well as for composite gene profiles for specific cell types derived from RNA sequencing in  
98 individual human neurons<sup>18</sup> (Extended Data Figs. 4). These findings suggest that hierar-  
99 chical gradients in neuronal cell-type distributions contribute to specialization of cortical  
100 microcircuits.

101 Gradients in the composition of synapses may endow cortical areas with functional  
102 specialization needed for diverse computations. One putative microanatomical correlate  
103 for the strength of recurrent synaptic excitation in local microcircuits is the number of  
104 excitatory synapses on pyramidal neurons, which can be quantified by dendritic spine  
105 counts. In macaque cortex, we found a strong negative MMC for basal-dendritic spine  
106 counts on pyramidal neurons<sup>19</sup> (Fig. 2g). This suggests a gradient of increasing local

107 recurrent strength along cortical hierarchy<sup>14</sup>. Distinct subunits of synaptic receptor pro-  
108 teins are expressed differentially across neuronal cell types and produce physiologically  
109 diverse synaptic properties. To investigate hierarchical gradients in receptor subunit com-  
110 position in human cortex, we examined expression profiles of genes that code for various  
111 excitatory and inhibitory synaptic receptor subunits (Fig. 2h–j). The gene *GRIN2B*, which  
112 codes for a glutamatergic NMDA receptor subunit mediating local synaptic excitation  
113 preferentially in association cortex<sup>20</sup>, exhibited a strong negative MMC, consistent with  
114 the observed macaque spine count gradient. Gene sets coding for neuromodulator recep-  
115 tors also contained hierarchical gradients (Extended Data Fig. 5). The positive and neg-  
116 ative MMCs reported in Fig. 2i,j suggest that gradients in local excitatory and inhibitory  
117 synaptic machinery contribute to functional specialization of cortical microcircuitry<sup>5,14</sup>.

118       How well does the myelin map capture the transcriptomic architecture of cortex in  
119 general? We performed principal component analysis (PCA) to identify the dominant  
120 areal patterns underlying gene expression variation (Fig. 3a–e, Extended Data Fig.6). We  
121 analyzed categorical sets of genes which are preferentially expressed in human brain,  
122 neurons, oligodendrocytes, and synaptic processes<sup>21</sup>, and developed a method to assess  
123 statistical significance through randomized surrogate data maps that preserve the spatial  
124 autocorrelation structure of the myelin map (Extended Data Fig. 7, see Methods). First,  
125 we found that myelin map topography is strongly correlated with the dominant axis of

126 gene expression variation, i.e., the first principal component (PC1) (MMC range: 0.84–  
127 0.86;  $P < 10^{-4}$  for each set) (Fig. 3b,d). PC1 captures a large fraction of overall gene  
128 expression variance (range: 22–28%, more than twice PC2 for each set) (Fig. 3c). PC1  
129 correlated more strongly with the myelin map than with maps of cortical thickness and  
130 distance from primary visual cortex (Extended Data Fig. 6d–k). For each gene set, the  
131 myelin map captures roughly two-thirds of the variance captured by PC1, which by con-  
132 struction captures the maximum variance for a linear combination of maps (Fig. 3e). The  
133 close alignment between myelin map topography and gene expression variance suggests  
134 that the dominant axis of human cortical transcriptomic organization relates to hierarchy.

135 To examine the functional roles of genes with strong hierarchical variation, we tested  
136 for their preferential enrichment in gene sets defined by functional and disease ontologies.  
137 We found that genes with stronger MMCs are enriched in more functional categories, rel-  
138 ative to genes with weaker MMCs, for all functional gene ontologies tested<sup>10,22</sup>: biolog-  
139 ical processes, cellular components, molecular functions, microRNA binding sites, and  
140 drug targets (Fig. 3f). These findings suggest that diverse key cell-biological processes  
141 contribute to hierarchical differentiation of cortical microcircuitry. Finally, we examined  
142 whether hierarchical expression is a preferential property of genes associated with psychi-  
143 atric and neurological disorders. The genes *APOE* and *SNCA*, which are strongly linked  
144 to Alzheimer’s and Parkinson’s diseases, respectively<sup>23</sup>, exhibit robust negative MMCs,



145 and therefore higher expression in association cortex (Extended Data Fig. 8). For a sys-  
146 tematic examination, we statistically quantified the enrichment of genes with strong hier-  
147 archical variation in disease-related gene sets<sup>10</sup>, obtained from the DisGeNet database<sup>24</sup>.  
148 Genes with strongly negative MMCs were significantly over-represented among multiple  
149 disease-related gene sets (Fig. 3g). In particular, sets for schizophrenia, bipolar disorder,  
150 autistic disorders, and depressive disorders are enriched with strongly negative MMC  
151 genes which are more highly expressed in association cortex. These findings suggest that  
152 brain disorders involve differential impacts to areas along the cortical hierarchy.

153 Taken together, our findings show that cortical hierarchy provides an organizing  
154 principle for the transcriptomic architecture of human cortex. Our results support the  
155 myelin map as a noninvasive neuroimaging proxy for hierarchical index in the absence  
156 of tract-tracing data. Hierarchy, as captured by the myelin map, defines an axis of micro-  
157 circuit specialization involving synapses and cell types, with relevance to brain disease.  
158 Manipulation of hierarchically expressed drug targets would allow regions of sensory  
159 or association cortex to be preferentially modulated through pharmacology. Large-scale  
160 mapping of the cortical transcriptome at finer spatial resolution will further elucidate  
161 the microcircuit basis of hierarchical specialization with laminar<sup>16</sup> and cell-type<sup>12,18</sup> speci-  
162 ficity. Furthermore, characterization of the developmental trajectory of hierarchical tran-  
163 scriptomic specialization<sup>25-27</sup> may inform the progression of neurodevelopmental disor-

164 ders. Our findings add to a growing understanding of how transcriptomic specialization  
165 shapes cortical function, including the spatiotemporal structure of intrinsic activity<sup>10,28,29</sup>  
166 and anatomical connectivity<sup>11,30</sup>. Hierarchical gradients of microcircuit properties across  
167 the human cortex may play key roles in functional specialization across large-scale cortical  
168 networks.

169 **Acknowledgements** We thank B.D. Fulcher, X.-J. Wang, R. Chaudhuri, and D.C. Glahn for useful  
170 discussions. This research was supported by BlackThorn Therapeutics and NIH grants R01MH112746,  
171 R01MH108590, and TL1 TR000141.

172 **Author Contributions** J.B.B., W.J.M., A.B., A.A. and J.D.M. designed the research. J.B.B., M.D.,  
173 W.J.E., N.N., and L.J. analyzed the data. J.D.M. supervised the project. J.B.B. and J.D.M. wrote the  
174 manuscript and prepared the figures. All authors contributed to editing the manuscript.

175 **Author Information** Correspondence and requests for materials should be addressed to J.D.M.  
176 ([john.murray@yale.edu](mailto:john.murray@yale.edu)).

- 177 1. Felleman, D. J. & Van Essen, D. C. Distributed hierarchical processing in the primate  
178 cerebral cortex. *Cereb Cortex* **1**, 1–47 (1991).
- 179 2. Barbas, H & Rempel-Clower, N. Cortical structure predicts the pattern of corticocor-  
180 tical connections. *Cereb Cortex* **7**, 635–646 (1997).
- 181 3. Markov, N. T. *et al.* Anatomy of hierarchy: feedforward and feedback pathways in  
182 macaque visual cortex. *J Comp Neurol* **522**, 225–59 (2014).
- 183 4. Hilgetag, C. C., Medalla, M., Beul, S. F. & Barbas, H. The primate connectome in  
184 context: Principles of connections of the cortical visual system. *Neuroimage* **134**, 685–  
185 702 (2016).
- 186 5. Murray, J. D. *et al.* A hierarchy of intrinsic timescales across primate cortex. *Nat Neu-*  
187 *rosci* **17**, 1661–3 (2014).
- 188 6. Bastos, A. M. *et al.* Visual areas exert feedforward and feedback influences through  
189 distinct frequency channels. *Neuron* **85**, 390–401 (2015).
- 190 7. Honey, C. J. *et al.* Slow cortical dynamics and the accumulation of information over  
191 long timescales. *Neuron* **76**, 423–434 (2012).
- 192 8. Margulies, D. S. *et al.* Situating the default-mode network along a principal gradient  
193 of macroscale cortical organization. *Proc Natl Acad Sci U S A* **113**, 12574–12579 (2016).

- 194 9. Hawrylycz, M. J. *et al.* An anatomically comprehensive atlas of the adult human  
195 brain transcriptome. *Nature* **489**, 391–9 (2012).
- 196 10. Hawrylycz, M. *et al.* Canonical genetic signatures of the adult human brain. *Nat Neu-*  
197 *rosci* **18**, 1832–44 (2015).
- 198 11. Fulcher, B. D. & Fornito, A. A transcriptional signature of hub connectivity in the  
199 mouse connectome. *Proc Natl Acad Sci U S A* **113**, 1435–40 (2016).
- 200 12. Lein, E. S., Belgard, T. G., Hawrylycz, M. & Molnár, Z. Transcriptomic perspectives  
201 on neocortical structure, development, evolution, and disease. *Annu Rev Neurosci* **40**,  
202 629–652 (2017).
- 203 13. Glasser, M. F. & Van Essen, D. C. Mapping human cortical areas in vivo based on  
204 myelin content as revealed by T1- and T2-weighted MRI. *J Neurosci* **31**, 11597–616  
205 (2011).
- 206 14. Chaudhuri, R., Knoblauch, K., Gariel, M.-A., Kennedy, H. & Wang, X.-J. A large-  
207 scale circuit mechanism for hierarchical dynamical processing in the primate cortex.  
208 *Neuron* **88**, 419–31 (2015).
- 209 15. Wagstyl, K., Ronan, L., Goodyer, I. M. & Fletcher, P. C. Cortical thickness gradients  
210 in structural hierarchies. *Neuroimage* **111**, 241–50 (2015).
- 211 16. Zeng, H. *et al.* Large-scale cellular-resolution gene profiling in human neocortex re-  
212 veals species-specific molecular signatures. *Cell* **149**, 483–96 (2012).
- 213 17. Markram, H. *et al.* Interneurons of the neocortical inhibitory system. *Nat Rev Neurosci*  
214 **5**, 793–807 (2004).
- 215 18. Lake, B. B. *et al.* Neuronal subtypes and diversity revealed by single-nucleus RNA  
216 sequencing of the human brain. *Science* **352**, 1586–90 (2016).
- 217 19. Elston, G. N. Cortex, cognition and the cell: new insights into the pyramidal neuron  
218 and prefrontal function. *Cereb Cortex* **13**, 1124–38 (2003).
- 219 20. Wang, H., Stradtman 3rd, G. G., Wang, X.-J. & Gao, W.-J. A specialized NMDA re-  
220 ceptor function in layer 5 recurrent microcircuitry of the adult rat prefrontal cortex.  
221 *Proc Natl Acad Sci U S A* **105**, 16791–16796 (2008).
- 222 21. Genovese, G. *et al.* Increased burden of ultra-rare protein-altering variants among  
223 4,877 individuals with schizophrenia. *Nat Neurosci* **19**, 1433–1441 (2016).
- 224 22. Chen, J., Bardes, E. E., Aronow, B. J. & Jegga, A. G. ToppGene Suite for gene list  
225 enrichment analysis and candidate gene prioritization. *Nucleic Acids Res* **37**, W305–  
226 11 (2009).
- 227 23. Bras, J. *et al.* Genetic analysis implicates APOE, SNCA and suggests lysosomal dys-  
228 function in the etiology of dementia with Lewy bodies. *Hum Mol Genet* **23**, 6139–46  
229 (2014).
- 230 24. Piñero, J. *et al.* DisGeNET: a comprehensive platform integrating information on hu-  
231 man disease-associated genes and variants. *Nucleic Acids Res* **45**, D833–D839 (2017).

- 232 25. Johnson, M. B. *et al.* Functional and evolutionary insights into human brain devel-  
233 opment through global transcriptome analysis. *Neuron* **62**, 494–509 (2009).
- 234 26. Bakken, T. E. *et al.* A comprehensive transcriptional map of primate brain develop-  
235 ment. *Nature* **535**, 367–75 (2016).
- 236 27. Whitaker, K. J. *et al.* Adolescence is associated with genomically patterned consol-  
237 idation of the hubs of the human brain connectome. *Proc Natl Acad Sci U S A* **113**,  
238 9105–10 (2016).
- 239 28. Wang, G.-Z. *et al.* Correspondence between resting-state activity and brain gene ex-  
240 pression. *Neuron* **88**, 659–66 (2015).
- 241 29. Krienen, F. M., Yeo, B. T. T., Ge, T., Buckner, R. L. & Sherwood, C. C. Transcriptional  
242 profiles of supragranular-enriched genes associate with corticocortical network ar-  
243 chitecture in the human brain. *Proc Natl Acad Sci U S A* **113**, E469–78 (2016).
- 244 30. Richiardi, J. *et al.* Correlated gene expression supports synchronous activity in brain  
245 networks. *Science* **348**, 1241–4 (2015).

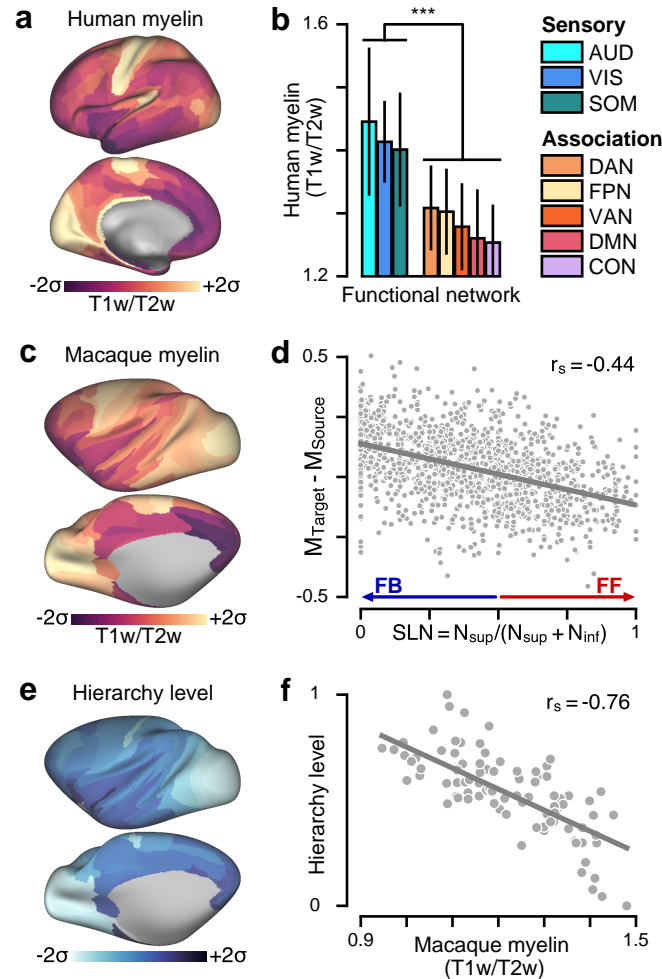

**Figure 1:** Cortical myelin maps noninvasively capture the hierarchical organization of primate cortex. **a**, The parcellated human myelin map (T1w/T2w MRI signal) in the left cortical hemisphere exhibits high values in primary sensory cortical areas relative to association areas. **b**, Human myelin map values are significantly lower in functionally defined association networks than in sensory networks ( $P < 10^{-3}$ ; Wilcoxon signed-rank test) (see Extended Data Fig. 1c) for network labels). Error bars mark the std. dev. across areas within a network. **c**, The parcellated macaque myelin map topography is similar to that of the human, suggesting that a homologous pattern of intracortical myelination across primate species. **d**, Myelin map variation predicts feedforward (FF) and feedback (FB) interareal projections in macaque cortex, as quantified by the fraction of labeled supra-granular layer neurons (SLN) in the source area. High and low SLN correspond to FF and FB projection motifs, respectively. SLN significantly correlates with the difference in myelin map values between target and source areas ( $r_s = -0.44$ ,  $P < 10^{-5}$ ; Spearman rank correlation). **e**, Hierarchy levels across cortical areas are estimated by fitting a generalized linear model to predict SLN from pairwise hierarchical distance. **f**, Hierarchy levels are reliably predicted by the myelin map values in macaque cortex ( $r_s = -0.76$ ,  $P < 10^{-5}$ ), demonstrating that myelin maps provide a noninvasive neuroimaging proxy measure for anatomical hierarchy in primate cortex.

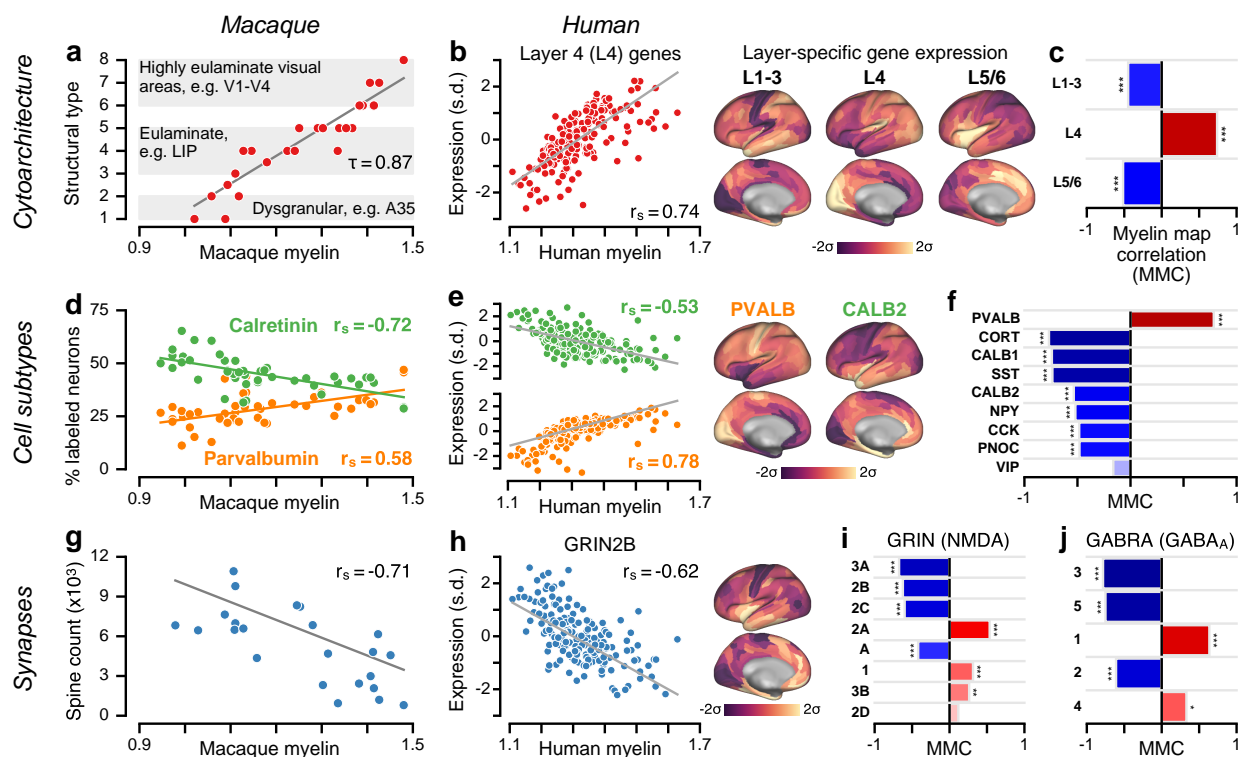

**Figure 2:** Myelin maps capture specialization of cortical microcircuitry in humans and nonhuman primates, for cytoarchitecture, inhibitory cell types, and synaptic composition. **a**, Cytoarchitectural type is reliably predicted by the myelin map in macaque cortex ( $\tau = 0.87$ ,  $P < 10^{-5}$ ; Kendall's tau correlation coefficient). Cortical areas were classified into one of eight cytoarchitectural types according to laminar thickness, laminar differentiation, and neuronal density. **b**, The average expression map of genes preferentially expressed in human granular layer 4 (L4) is positively correlated with myelin map values ( $r_s = 0.74$ ,  $P < 10^{-5}$ ; Spearman rank correlation), consistent with a more prominent granular L4 in sensory than association cortex. **c**, Average expression maps of laminar-specific genes, which are preferentially expressed in specific cortical layers in humans, show significant myelin map correlations (MMCs). L1-3: supragranular layers 1-3; L5/6: infragranular layers 5 and 6. **d**, The macaque cortical myelin maps capture areal variation in the relative proportions of calretinin- and parvalbumin-positive inhibitory interneurons. **e**, The genes *CALB2* and *PVALB*, which respectively code for calretinin and parvalbumin, exhibit hierarchical gradients in human cortex that are consistent with anatomical gradients in the macaque. **f**, Expression maps of established genes coding for markers of specific inhibitory interneuron cell types exhibit hierarchical gradients across human cortex. **g**, Basal-dendritic spine counts on pyramidal cells are significantly anti-correlated with myelin map values ( $r_s = -0.71$ ,  $P < 10^{-4}$ ). **h**, The gene *GRIN2B*, which codes for the NMDA receptor subunit NR2B, exhibits a negative MMC ( $r_s = -0.62$ ,  $P < 10^{-4}$ ). **i**, **j**, Expression maps for genes coding for distinct subunits of the excitatory NMDA receptor and inhibitory GABA<sub>A</sub> receptor exhibit both positive and negative hierarchical gradients. For bar plots, statistical significance is calculated through a spatial autoregressive model to account for spatial autocorrelation in maps: \*,  $P < 10^{-1}$ ; \*\*,  $P < 10^{-2}$ ; \*\*\*,  $P < 10^{-3}$ .

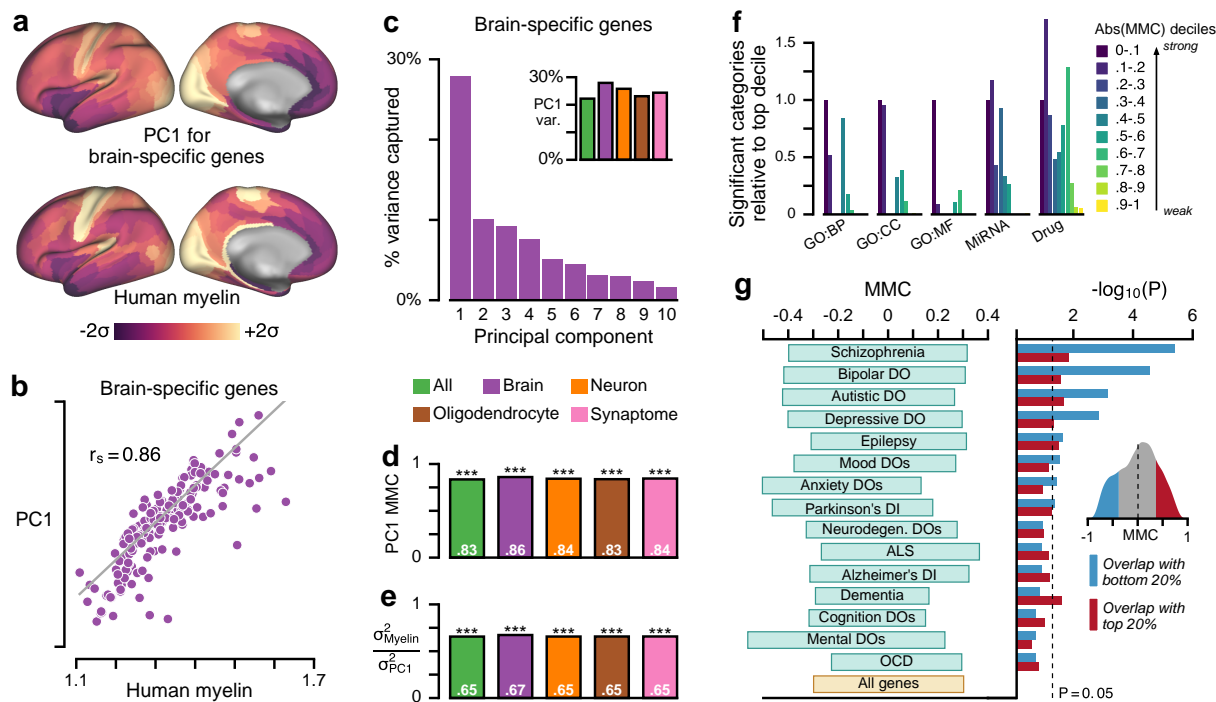

**Figure 3:** The myelin map captures the dominant spatial axis of gene expression variation across human cortex, as defined by principal component analysis (PCA), and hierarchical variation relates to enrichment in neurobiological function and brain disorders. **a**, The first spatial principal component (PC1), shown here for a set of brain-specific genes, is by definition the spatial map that linearly captures the maximum variation in gene expression. **b**, PC1 for this set is highly correlated with the myelin map (MMC = 0.86;  $P < 10^{-4}$ ). **c**, PC1 captures a large fraction of total gene expression variance. *Inset*: Variance captured by PC1 for five gene sets: all genes in our dataset; genes preferentially expressed in brain relative to other human tissues; genes preferentially expressed in either neurons or oligodendrocytes relative to other brain cell types; and genes related to synaptic processes. **d**, Across all gene sets, PC1 exhibits a highly similar areal topography to the myelin map (MMC range: 0.84–0.86;  $P < 10^{-4}$  for each). **e**, The amount of gene expression variance captured by the myelin map ( $\sigma_{Myelin}^2$ ) is roughly two-thirds of the theoretical maximum established by PC1 ( $\sigma_{PC1}^2$ ). For panels (d,e), statistical significance is calculated through permutation testing with surrogate maps that preserve the spatial autocorrelation structure of the myelin map (see Methods): \*,  $P < 10^{-1}$ ; \*\*,  $P < 10^{-2}$ ; \*\*\*,  $P < 10^{-3}$ . **f**, Gene ontology enrichment analysis, using quantiles of absolute MMC. Genes with strong MMCs are overrepresented in functional annotations across multiple gene ontologies (GO). BP, biological process; CC, cellular component; MF, molecular function; MiRNA, microRNA binding site. **g**, Genes with strong negative MMCs are overrepresented in multiple gene sets associated with brain disorders. *Left panel*: Interquartile ranges of MMC for gene sets. *Right panel*: Enrichment is quantified by the hypergeometric test, which assesses the statistical significance of overlap between each gene set and the top (red) or bottom (blue) 20% MMC genes. DO, disorder; DI, disease; ALS, amyotrophic lateral sclerosis; OCD, obsessive-compulsive disorder. *Inset*: Distribution of MMCs across genes. The dotted line marks the mean of the population (0.006).

## 246 **Methods**

247 **Parcellated cortical myelin maps (T1w/T2w).** Cortical myelin maps were defined as  
248 the ratio of T1- to T2-weighted (T1w/T2w) MRI maps as previously characterized<sup>13,31</sup>,  
249 using the surface-based CIFTI format<sup>32</sup>. The T1w/T2w map has been shown to corre-  
250 late with grey-matter intracortical myelination and to reflect architectonic boundaries be-  
251 tween cortical areas<sup>13,31</sup>. Of note, it may not index myelin content in white matter. The  
252 group-averaged ( $N = 69$ ) human myelin map was obtained from the publicly available  
253 Conte69 dataset, which was reported previously to study myelin maps<sup>13</sup>. The group-  
254 averaged ( $N = 334$ ) cortical thickness map was obtained from the Human Connectome  
255 Project (HCP)<sup>33</sup>. Human myelin map values for the left cortical hemisphere were parcel-  
256 lated into 180 areas using the Multi-Modal Parcellation (MMP1.0) from the HCP<sup>32</sup>. As-  
257 signment of MMP1.0 parcels to functional networks (Fig. 1b, Extended Data Fig. 1c) was  
258 performed through community detection analysis[34] on time-series correlation from the  
259 HCP resting-state fMRI dataset.

260 The group-averaged macaque myelin and thickness maps were obtained from the  
261 publicly available BALS database<sup>35</sup> ( $N = 19$ ) ([https://balsa.wustl.edu/study/  
262 show/W336](https://balsa.wustl.edu/study/show/W336)). Macaque myelin map values for the left cortical hemisphere were par-  
263 cellated into 91 areas using the M132 parcellation which was used for the anatomical  
264 tract-tracing dataset<sup>35</sup>. Geodesic distance between two parcels  $i$  and  $j$  is calculated as the



265 average of all pairwise surface-based distances between grayordinate vertices in parcel  $i$   
266 and vertices in parcel  $j$ .

267 **Anatomical hierarchy levels in macaque.** To assess whether macaque cortical myelin  
268 maps could reliably capture the laminar-specific interareal projection patterns conven-  
269 tionally used to define anatomical hierarchy, we fit a generalized linear model (GLM)  
270 to quantitative laminar projection data, yielding ordinal hierarchy values in 89 corti-  
271 cal areas, following the procedure of ref. [3]. Anatomical tract-tracing data, derived  
272 from retrograde tracers, was obtained from the publicly available Core-Nets database  
273 (<http://core-nets.org>). Retrograde tracer was injected into a target area  $i$ , and the  
274 number of labeled neurons in source area  $j$  were counted. The fraction of external la-  
275 beled neurons,  $FLNe_{ij}$ , is a quantitative measure of connection strength defined as the  
276 number of labeled neurons in the source area normalized by the total number of labeled  
277 neurons in all external cortical source areas for a given injection<sup>36</sup>. Labeled neurons in  
278 the source areas are classified by location in either supragranular or infragranular lay-  
279 ers. For a given projection, the proportion of supragranular labeled neurons,  $SLN_{ij}$ , is  
280 defined as the ratio of  $N_{\text{supra}}$  to  $N_{\text{supra}} + N_{\text{infra}}$  for neurons labeled in source area  $j$ . As  
281 feedforward and feedback connections preferentially originate in supragranular and in-  
282 fragranular layers, respectively<sup>1-3</sup>, SLN is a quantitative measure of hierarchical distance  
283 between two cortical areas<sup>3</sup>: under this paradigm for laminar-specific projection motifs, a

284 pure feedforward connection from source area  $j$  to target area  $i$  would originate entirely  
285 in the superficial layers, resulting in an SLN of 1. Conversely, a pure feedback projection  
286 originating entirely in deep infragranular layers would result in an SLN of 0.

287 The GLM procedure for fitting hierarchy from SLN data is described in detail in  
288 ref. [3]. In brief, the hypothesis that SLN is indicative of hierarchical distance can be ex-  
289 pressed as  $g(SLN_{ij}) = H_i - H_j$ , where  $H_i$  corresponds to the hierarchical position of area  
290  $i$ , and  $g$  is an arbitrary and possibly nonlinear function linking SLN values on the unit  
291 interval  $(0, 1)$  to their corresponding hierarchical distance. We used a logit link function  
292 to map SLN values from the unit interval to the entire real number line following the pro-  
293 cedure of ref. [14]. Fitting linear predictors (i.e. hierarchical levels) to logit-transformed  
294 SLN values formulates a type of generalized linear model, with maximum likelihood  
295 estimation assuming a binomial family probability distribution for the supra- and infra-  
296 granular neuron counts. To assign more weight to stronger connections during model  
297 estimation of hierarchical levels, we also weight each pathway in the model by the nega-  
298 tive logarithm of the FLNe value. We clip SLN values to lie in the interval  $(0.01, 0.99)$  so  
299 the logit-transformed SLN value is well-defined for all pathways used to fit the model.  
300 Furthermore, to reduce the impact of noise on model parameter estimation, we only in-  
301 cluded pathways which contained at least 100 projection neurons when fitting the GLM;  
302 we confirmed that results were generally robust to the choice of neuron count threshold.

303 Maximum likelihood estimation of model parameters was done in the R program-  
304 ming language using the `glm` function. The model-estimated hierarchy levels, invariant  
305 under linear transformations, were rescaled to span the unit interval  $[0, 1]$ . To assess the  
306 statistical relationship between myelin map value and hierarchy level, we calculated the  
307 Spearman rank correlation between the 89 ordinal hierarchy values and their correspond-  
308 ing parcellated myelin map values (Fig. 1f). For visual clarity in Fig. 1c,d we remove this  
309 nonlinear transformation by displaying model-estimated hierarchy levels after applying  
310 the inverse-logit (i.e., logistic) transformation. This rescaling preserves the ordering of  
311 areas and therefore does not affect the reported Spearman rank correlations.

312 **Macaque anatomical data: cytoarchitectural types, inhibitory interneuron densities,**  
313 **and pyramidal neuron spine counts.** To quantify the statistical relationship between  
314 myelin map value and categorical cytoarchitectural type (Fig. 2a), we compared myelin  
315 map values to structural classification values reported for 29 regions of primate visual cor-  
316 tex, obtained from ref. [4]. To characterize hierarchical distributions of cortical inhibitory  
317 interneuron cell types (Fig. 2b), we compiled, from multiple immunohistochemical stud-  
318 ies, the relative densities of inhibitory interneurons which are immunoreactive (ir) to the  
319 three calcium-binding proteins parvalbumin (PV), calretinin (CR), and calbindin (CB)<sup>37-40</sup>.  
320 To characterize hierarchical variation in pyramidal neuron excitatory synaptic connectiv-  
321 ity (Fig. 2c), we compiled, from multiple studies by Elston and colleagues<sup>41-46</sup>, the number

322 of spines of basal-dendritic trees of layer-3 pyramidal neurons.

323 For each of these three analyses, we produced a mapping between the 91 areas in the  
324 M132 atlas parcellation, where the myelin map values are calculated, to the architectonic  
325 areas reported in these collated studies (Supplementary Table 1). Where the anatomical  
326 mapping was not a one-to-one correspondence, we mapped the reported anatomical area  
327 onto the set of all M132 parcels with nonzero spatial overlap, and the myelin map value  
328 was calculated as the average across these M312 parcels.

329 **Gene expression preprocessing.** The Allen Human Brain Atlas (AHBA) is a publicly  
330 available transcriptional atlas containing gene expression data, measured with DNA mi-  
331 croarrays, that are sampled from hundreds of histologically validated neuroanatomical  
332 structures across six normal post-mortem human brains<sup>9</sup>. After no significant inter-  
333 hemispheric transcriptional differences were observed in the first two bilaterally profiled  
334 brains<sup>9</sup>, the remaining four donor brains were profiled only in the left cortical hemi-  
335 sphere<sup>10</sup>. To construct parcellated group-averaged expression maps, we therefore re-  
336 stricted all analyses to microarray data sampled from the left cortical hemisphere in each  
337 of the six brains. Microarray expression data and all accompanying metadata were down-  
338 loaded from the AHBA (<http://human.brain-map.org>)<sup>9,10</sup>. The raw microarray ex-  
339 pression data for each of the six donors includes expression levels of 20,737 genes, pro-  
340 filed by 58,692 microarray probes. These data were preprocessed according to following

341 procedure:

342 1. Gene probes without a valid Entrez Gene ID were excluded.

343 2. Cortical samples exhibiting exceptionally low inter-areal similarity were excluded. We  
344 first computed the spatial correlation matrix of expression values between samples us-  
345 ing the remaining 48,170 probes, then summed this matrix across all samples. Samples  
346 whose similarity measure was more than five standard deviations below the mean  
347 across all samples were excluded. At most, this step excluded three samples within a  
348 subject.

349 3. Samples whose annotations did not indicate that they originated in the left hemisphere  
350 of the cerebral cortex were excluded. To focus analysis to neocortex, we also excluded  
351 samples taken from cortical structures that are cytoarchitecturally similar to the hip-  
352 pocampus, including the rhinal sulcus, piriform cortex, parahippocampal gyrus, and  
353 the hippocampal formation.

354 4. The remaining cortical samples were mapped from volumetric space onto a two di-  
355 mensional cortical surface by minimizing the pairwise 3D Euclidean distance between  
356 the stereotaxic MNI coordinates reported for each sample, and each grayordinate ver-  
357 tex in the group-averaged surface mesh of the midthickness map in the Conte69 brain  
358 atlas. Cortical samples whose Euclidean distance to the nearest surface vertex was  
359 more than two standard deviations above the mean distance computed across all sam-

360 ples were excluded (excluding between 4 and 13 samples per subject). An average  
361 of  $203 \pm 32$  samples per subject, yielding 1219 total samples across all six subjects,  
362 remained at this stage.

363 5. Expression profiles for samples mapped onto the same surface vertex were averaged.

364 Then expression profiles for each remaining sample were z-scored across gene probes.

365 6. Expression profiles for each of the 180 unilateral parcels in the HCP's MMP1.0 cortical

366 parcellation<sup>32</sup> were computed in one of the two following ways. (I) For parcels which

367 had at least one sample mapped directly onto one of their constituent surface vertices,

368 parcellated expression values were computed by averaging expression levels across

369 all samples mapped onto the parcel. (II) For parcels which had no samples mapped

370 onto any of their constituent vertices, we first created densely interpolated expression

371 maps, in which each surface vertex was assigned the expression level associated with

372 the most proximal surface vertex onto which a sample had been mapped (i.e., a Voronoi

373 diagram), determined using surface-based geodesic distance along the cortical surface;

374 the average of expression levels across parcels' constituent vertices was then computed

375 to obtain parcellated expression values.

376 7. A coverage score was also assigned to each gene probe, defined as the fraction of 180

377 parcels that had at least one sample mapped directly onto one of its constituent surface

378 vertices. Probes with coverage below 0.4 (i.e., probes for which fewer than 72 of the

379 180 parcels contained samples) were excluded.

380 8. For each gene profiled by multiple gene probes, we selected and used the expression  
381 profile of a single representative probe. If two probes were available, we selected the  
382 probe with maximum gene expression variance across sampled cortical structures, in  
383 order to more reliably capture spatial patterns of areal heterogeneity. If three or more  
384 probes were available, we selected a probe using a procedure similar to the one de-  
385 scribed in step 2: we computed a correlation matrix of parcellated gene expression  
386 values across the available gene probes, summed the resultant matrix along one of its  
387 dimensions to obtain a quantitative similarity measure for each probe, relative to the  
388 other gene probes, and selected the probe with the highest similarity measure, as it is  
389 most highly representative among all available gene probes.

390 9. Each subject-level gene expression profile was z-scored before we computed group-  
391 level expression profiles, which were obtained by computing the mean across subjects  
392 which were assigned a probe for that gene. Genes were excluded if fewer than four  
393 subjects were assigned a probe. Finally, group-level expression profiles were z-scored  
394 across areas for each gene.

395 These steps yielded group-averaged expression values for 16,040 genes across 180 cortical  
396 areas, which were used for all analyses reported here. The myelin map correlation (MMC)  
397 for each gene is reported in Supplementary Table 2.

398 **Categorical gene sets.** We conducted analyses on biologically and physiologically mean-  
399 ingful gene sets extracted from existing databases and neuroscientific literature, reported  
400 below (Supplementary Table 2):

401 1. **Brain-specific.** Genes with expression specific to human brain tissue, relative to  
402 other tissues, were obtained from supplementary data set 1 of ref. [47]. Following  
403 ref. [21], brain-specific genes were selected for which expression in brain tissue was  
404 four times higher than the median expression across all 27 different tissues.

405 2. **Neuron- and oligodendrocyte-specific.** Brain genes with expression specific to neu-  
406 rons or oligodendrocytes, relative to other central nervous system (CNS) cell types,  
407 were obtained from supplementary data set S3b of ref. [48]. Following ref. [21],  
408 neuron-specific genes were selected for which log-expression in neurons of P7n cell  
409 type in the mouse was 0.5 greater than the median log-expression across 11 CNS cell  
410 types.

411 3. **Synaptome.** Four synaptic gene sets encoding proteins in the presynaptic nerve  
412 terminal, presynaptic active zone, synaptic vesicles, and postsynaptic density, were  
413 obtained from SynaptomeDB, an ontology-based database of genes in the human  
414 synaptome<sup>49</sup>.

415 4. **Neuron subtype-specific.** Gene sets representing distinct classes of neuronal sub-  
416 types were obtained from ref. [18], in which clustering and classification analyses



417 yielded 16 distinct neuron subtypes, on the basis of differential gene expression  
418 measured by RNA sequencing from single neurons in human cortex. The fraction  
419 of positive values using exon-only derived transcripts per million (TPM) associated  
420 with each subtype-specific gene were obtained from supplementary table S5; within  
421 each neuronal subtype cluster, the TPM values for the cluster genes were normal-  
422 ized and used to create a weighted gene expression profile representative of each  
423 subtype's spatial topography (Extended Data Fig. 4).

424 **5. Layer-specific.** Sets of laminar-specific genes localized to different layers of hu-  
425 man neocortex were obtained from supplementary table S2 of ref. [16]. Genes were  
426 broadly grouped into sets representative of supragranular (L1–3), granular (L4), and  
427 infragranular (L5/6) layers.

428 **Spatial autoregressive modeling.** Significance values as indicated by the number of  
429 stars reported on barplots for myelin map correlations were corrected to account for spa-  
430 tial autocorrelation structure in parcellated myelin map and gene expression values. Be-  
431 cause physical quantities like cortical myelination and gene expression must vary smoothly  
432 and continuously in space, measurements recorded from proximal cortical areas tend to  
433 be more similar than measurements recorded from distal areas of cortex. This depar-  
434 ture from the assumption of independent observations biases calculations of statistical  
435 significance. To model this spatial autocorrelation, we used a spatial lag model (SLM)

436 commonly applied in the spatial econometrics literature<sup>50</sup>, of the form  $y = \rho W y + X\beta + \nu$ ,  
437 where  $W$  is a weight matrix implicitly specifying the form of spatial structure in the data,  
438 and  $\nu$  is normally distributed.

439 To implement a spatial lag model in the python programming language, we used the  
440 maximum likelihood estimation routine defined in the Python Spatial Analysis Library  
441 (*pysal*)<sup>51</sup>. We first determined the surface-based spatial separation between each pair of  
442 cortical parcels by computing the mean of the pairwise distances between a vertex in  
443 parcel  $i$  and a vertex in parcel  $j$ , from which we constructed a pairwise parcel distance  
444 matrix,  $D$ .

445 Similarity of gene expression profiles was well-approximated by an exponential de-  
446 caying spatial autocorrelation function (Extended Data Fig. 7), as was found in mouse  
447 cortex<sup>11</sup>. We fitted the correlation of gene expression profiles between two areas with the  
448 exponential function  $\text{Corr}(x_i, x_j) \sim \exp(-D_{ij}/d_0)$ , where  $x_i$  and  $x_j$  are vectors contain-  
449 ing the parcellated gene expression values at parcels  $i$  and  $j$ ,  $D_{ij}$  is the geodesic distance  
450 between the parcels, and  $d_0$  is the characteristic spatial scale of autocorrelation. We em-  
451 pirically determined  $d_0$  by first constructing the pairwise gene co-expression matrix  $C_{ij} =$   
452  $\text{Corr}(x_i, x_j)$ , where  $x_i$  and  $x_j$  are vectors containing the parcellated gene expression values  
453 at parcels  $i$  and  $j$ . We then fit the free parameter  $d_0$  using ordinary least squares (OLS)  
454 regression on the off-diagonal (upper-triangular) elements of the gene co-expression and

455 parcel distance matrices, so as to minimize the sum-of-squared-residuals between em-  
456 pirical and model-estimated gene co-expression values over all pairs of cortical parcels,  
457  $S = \sum_{i>j} r_{ij}^2 = \sum_{i>j} [C_{ij} - \exp(-D_{ij}/d_0)]^2$ . This empirical fit was performed on a set of brain-  
458 specific genes. Using the OLS estimate of the spatial autocorrelation scale from the fit to  
459 the empirical gene expression data, we calculated the elements of the spatial weight ma-  
460 trix,  $W_{ij} = \exp(-D_{ij}/d_0)$ . Finally, we fit the SLM to parcellated gene expression profiles,  
461 using the maximum likelihood estimator routine (`pysal.spreg.ml_lag.ML_Lag`) in  
462 `pysal`. P-values indicated by the number of stars in the bar plots of myelin map correla-  
463 tion correspond to p-values for model parameter  $\beta$  defined above.

464 Of note, spatial autoregressive model parameters do not have the same interpreta-  
465 tion as they do in OLS regression. The parameter  $\beta$  reflects the direct (i.e. local) impact on  
466 the dependent variable  $y$  due to a unit change in the independent variable  $x$ . In addition,  
467 because of the underlying spatial structure, the direct impact of  $x_i$  on  $y_i$  results in an indi-  
468 rect effect of  $y_i$  on neighboring  $y_j$ . Therefore  $\beta$  cannot be interpreted as a corrected, global  
469 correlation coefficient, and we restrict our use of the SLM to correcting for the biasing  
470 effect of spatially autocorrelated samples on reported significance values.

471 **Theil-Sen estimator.** Trend lines in figures are calculated by the Theil-Sen estimator,  
472 which is a nonparametric estimator of linear slope, based on Kendall's tau rank correla-  
473 tion, that is insensitive to the underlying distribution and robust to statistical outliers<sup>52</sup>.

474 It is defined as the median of the set of slopes computed between all pairs of points.

475 **Principal components analysis.** We used principal component analysis (PCA) to iden-  
476 tify the dominant modes of spatial variation in the transcriptional profiles of gene ex-  
477 pression in the human cortex. For a set of  $N$  genes, each with group-averaged expres-  
478 sion values for  $P$  cortical parcels, we constructed a gene expression matrix  $\mathbf{G}$  with one  
479 row for each cortical parcel and one column for each unique gene (i.e. with dimen-  
480 sions  $P \times N$ ). The  $P \times P$  spatial covariance matrix  $\mathbf{C}$  was constructed by computing  
481 the covariance between vectors of gene expression values for each pair of cortical parcels:  
482  $C_{ij} = \text{Cov}(G_i, G_j)$ , where  $G_i$  is the  $i$ -th row in the matrix  $\mathbf{G}$ , corresponding to the vector of  
483  $N$  gene expression values for the  $i$ -th cortical parcel. Eigen-decomposition is performed  
484 on the spatial covariance matrix to obtain the matrix eigenvectors (i.e., the principal com-  
485 ponents, PCs) and their corresponding eigenvalues, which are the amount of variance  
486 captured by the corresponding PC. To enumerate each principal component, eigenvalues  
487 are ranked in descending order of absolute magnitude, with larger magnitudes indicating  
488 a greater proportion of the total variance captured by the associated PC (i.e., the associ-  
489 ated mode of spatial covariation). PCA therefore allows for simultaneous identification  
490 of spatial patterns of covariation and quantification of the extent to which these spatial  
491 modes capture variance in cortical gene expression profiles.

492 To quantify the overlap of these spatial PCs with the cortical myelin map vector, we

493 compute the Spearman rank correlation coefficient between each  $P$ -dimensional PC and  
494 the  $P$ -dimensional vector of myelin map values for each cortical parcel. We can quantify  
495 the amount of gene expression variance that is captured along any given spatial map, such  
496 as the myelin map (Fig. 3e, Extended Data Fig. 6g,k). From the spatial covariance matrix  
497  $\mathbf{C}$ , the variance captured along a unit-length vector  $\mathbf{a}$ , here a demeaned and normalized  
498 map, is given by  $\mathbf{a}^\top \mathbf{C} \mathbf{a}$ .

499 **Surrogate data generation.** To nonparametrically determine significance values in our  
500 PCA results, in Fig. 3 and Extended Data Fig. 6, we generated surrogate maps with a  
501 spatial autocorrelation structure matched to the empirical data (Extended Data Fig. 7b).  
502 Parameters characterizing the empirical spatial autocorrelation were determined numer-  
503 ically for the cortical myelin map, cortical thickness map, and the map of surface-based  
504 geodesic distance from area V1; in each case, we fit the data using a spatial lag model of  
505 the form  $\mathbf{y} = \rho \mathbf{W} \mathbf{y}$ , where  $\mathbf{y}$  is a vector of mean-subtracted map values.  $\mathbf{W}$  is the weight  
506 matrix with zero diagonal and off-diagonal elements  $W_{ij} = \exp(-D_{ij}/d_0)$ , where  $D_{ij}$  is the  
507 surface-based geodesic distance between cortical areas  $i$  and  $j$ . Two free parameters  $\rho$  and  
508  $d_0$  are estimated by minimizing the residual sum-of-squares<sup>50</sup>. Using best-fit parameter  
509 values  $\hat{\rho}$  and  $\hat{d}_0$ , surrogate maps  $\mathbf{y}_{\text{surr}}$  are generated according to  $\mathbf{y}_{\text{surr}} = \left( \mathbb{I} - \hat{\rho} \mathbf{W}[\hat{d}_0] \right)^{-1} \mathbf{u}$ ,  
510 where  $\mathbf{u} \sim \mathcal{N}(0, 1)$ . From these surrogate maps we construct null distributions for the ap-  
511 propriate statistics, and report significance values as the proportion of samples in the null

512 distribution whose absolute value is equal to or greater than the absolute value of the test  
513 statistic.

514 **Functional enrichment analyses.** Functional enrichments were determined using the  
515 ToppGene (<https://toppgene.cchmc.org/>) web portal<sup>22</sup>, including gene ontology  
516 annotations (biological process, cellular component, and molecular function); microRNA  
517 targets (from all sources indicated on <https://toppgene.cchmc.org/navigation/database.jsp>);  
518 and drug annotations (from DrugBank, Comparative Toxicogenomics Database, includ-  
519 ing marker and therapeutic, and Broad Institute CMAP). Significant genes in each cate-  
520 gory were identified using the ToppFun utility. Disease annotations were determined us-  
521 ing curated disease gene associations in the DisGeNet database<sup>24</sup> ([http://www.disgenet.](http://www.disgenet.org/web/DisGeNET/menu/home)  
522 [org/web/DisGeNET/menu/home](http://www.disgenet.org/web/DisGeNET/menu/home)). Hypergeometric testing was used to determine sig-  
523 nificant over-representation of brain-related disease genes in the top and bottom gene  
524 quintiles (20%, 3208 genes) ranked by myelin map correlation, following ref. [10].

- 525 31. Glasser, M. F., Goyal, M. S., Preuss, T. M., Raichle, M. E. & Van Essen, D. C. Trends  
526 and properties of human cerebral cortex: correlations with cortical myelin content.  
527 *Neuroimage* **93 Pt 2**, 165–75 (2014).
- 528 32. Glasser, M. F. *et al.* A multi-modal parcellation of human cerebral cortex. *Nature* **536**,  
529 171–8 (2016).
- 530 33. Van Essen, D. C. *et al.* The WU-Minn Human Connectome Project: an overview. *Neu-*  
531 *roimage* **80**, 62–79 (2013).
- 532 34. Ito, T. *et al.* Cognitive task information is transferred between brain regions via  
533 resting-state network topology. *bioRxiv*. <[https://www.biorxiv.org/content/  
534 early/2017/08/02/101782](https://www.biorxiv.org/content/early/2017/08/02/101782)> (2017).
- 535 35. Donahue, C. J. *et al.* Using diffusion tractography to predict cortical connection strength  
536 and distance: a quantitative comparison with tracers in the monkey. *J Neurosci* **36**,  
537 6758–70 (2016).
- 538 36. Markov, N. T. *et al.* A weighted and directed interareal connectivity matrix for macaque  
539 cerebral cortex. *Cereb Cortex* (2012).
- 540 37. Condé, F, Lund, J. S., Jacobowitz, D. M., Baimbridge, K. G. & Lewis, D. A. Local  
541 circuit neurons immunoreactive for calretinin, calbindin D-28k or parvalbumin in  
542 monkey prefrontal cortex: distribution and morphology. *J Comp Neurol* **341**, 95–116  
543 (1994).
- 544 38. Gabbott, P. L. & Bacon, S. J. Local circuit neurons in the medial prefrontal cortex  
545 (areas 24a,b,c, 25 and 32) in the monkey: II. Quantitative areal and laminar distribu-  
546 tions. *J Comp Neurol* **364**, 609–36 (1996).
- 547 39. Kondo, H, Tanaka, K, Hashikawa, T & Jones, E. G. Neurochemical gradients along  
548 monkey sensory cortical pathways: calbindin-immunoreactive pyramidal neurons  
549 in layers II and III. *Eur J Neurosci* **11**, 4197–203 (1999).
- 550 40. Dombrowski, S. M., Hilgetag, C. C. & Barbas, H. Quantitative architecture distin-  
551 guishes prefrontal cortical systems in the rhesus monkey. *Cereb Cortex* **11**, 975–88  
552 (2001).
- 553 41. Elston, G. N. & Rosa, M. G. The occipitoparietal pathway of the macaque monkey:  
554 comparison of pyramidal cell morphology in layer III of functionally related cortical  
555 visual areas. *Cereb Cortex* **7**, 432–52 (1997).
- 556 42. Elston, G. N. & Rosa, M. G. Morphological variation of layer III pyramidal neurones  
557 in the occipitotemporal pathway of the macaque monkey visual cortex. *Cereb Cortex*  
558 **8**, 278–94 (1998).
- 559 43. Elston, G. N., Tweedale, R & Rosa, M. G. Cortical integration in the visual system of  
560 the macaque monkey: large-scale morphological differences in the pyramidal neu-  
561 rons in the occipital, parietal and temporal lobes. *Proc Biol Sci* **266**, 1367–74 (1999).
- 562 44. Elston, G. N. & Rockland, K. S. The pyramidal cell of the sensorimotor cortex of the  
563 macaque monkey: phenotypic variation. *Cereb Cortex* **12**, 1071–8 (2002).

- 564 45. Elston, G. N., Benavides-Piccione, R. & Defelipe, J. A study of pyramidal cell struc-  
565 ture in the cingulate cortex of the macaque monkey with comparative notes on in-  
566 ferotemporal and primary visual cortex. *Cereb Cortex* **15**, 64–73 (2005).
- 567 46. Elston, G. N., Oga, T., Okamoto, T. & Fujita, I. Spinogenesis and Pruning in the An-  
568 terior Ventral Inferotemporal Cortex of the Macaque Monkey: An Intracellular Injec-  
569 tion Study of Layer III Pyramidal Cells. *Front Neuroanat* **5**, 42 (2011).
- 570 47. Fagerberg, L. *et al.* Analysis of the human tissue-specific expression by genome-wide  
571 integration of transcriptomics and antibody-based proteomics. *Mol Cell Proteomics*  
572 **13**, 397–406 (2014).
- 573 48. Cahoy, J. D. *et al.* A transcriptome database for astrocytes, neurons, and oligodendro-  
574 cytes: a new resource for understanding brain development and function. *J Neurosci*  
575 **28**, 264–78 (2008).
- 576 49. Pirooznia, M. *et al.* SynaptomeDB: an ontology-based knowledgebase for synaptic  
577 genes. *Bioinformatics* **28**, 897–9 (2012).
- 578 50. Anselin, L. in *A companion to theoretical econometrics* (ed Baltagi, B. H.) 310–330 (Black-  
579 well, Malden, Mass., 2001).
- 580 51. Fischer, M. M. & Getis, A. *Handbook of applied spatial analysis: software tools, methods*  
581 *and applications* (Springer, Berlin, 2010).
- 582 52. Sen, P. K. Estimates of the regression coefficient based on Kendall's tau. *Journal of the*  
583 *American Statistical Association* **63**, 1379–1389 (1968).



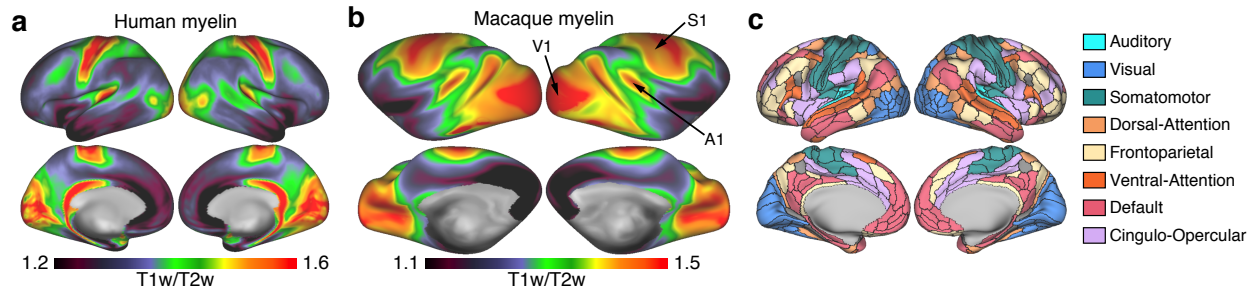

**Extended Data Figure 1:** Cortical myelin maps exhibit inter-species homology and inter-hemispheric symmetry. **a**, Unparcellated bilateral myelin map (T1w/T2w) in human cortex visualized on an inflated cortical surface. **b**, Unparcellated bilateral myelin map (T1w/T2w) in macaque cortex visualized on an inflated cortical surface. Primary sensory areas (visual, V1; somatosensory, S1; auditory, A1) exhibit high myelin map values, as do their homologues in human cortex. **c**, Functional networks derived from resting-state functional connectivity from the Human Connectome Project (HCP). Cortical areas are parcellated using the HCP multi-modal parcellation (MMP1.0). We assigned each region to a functional network using a community detection method applied to resting-state fMRI data from the HCP, and designated functional labels to networks, including three sensory and five association, that align with previously reported functional networks (with abbreviations labeled in Fig. 1b): Auditory (AUD), Visual (VIS), Somatomotor (SOM), Dorsal Attention (DAN), Frontoparietal (FPN), Ventral Attention (VAN), Default (DMN), and Cingulo-Opercular (CON).

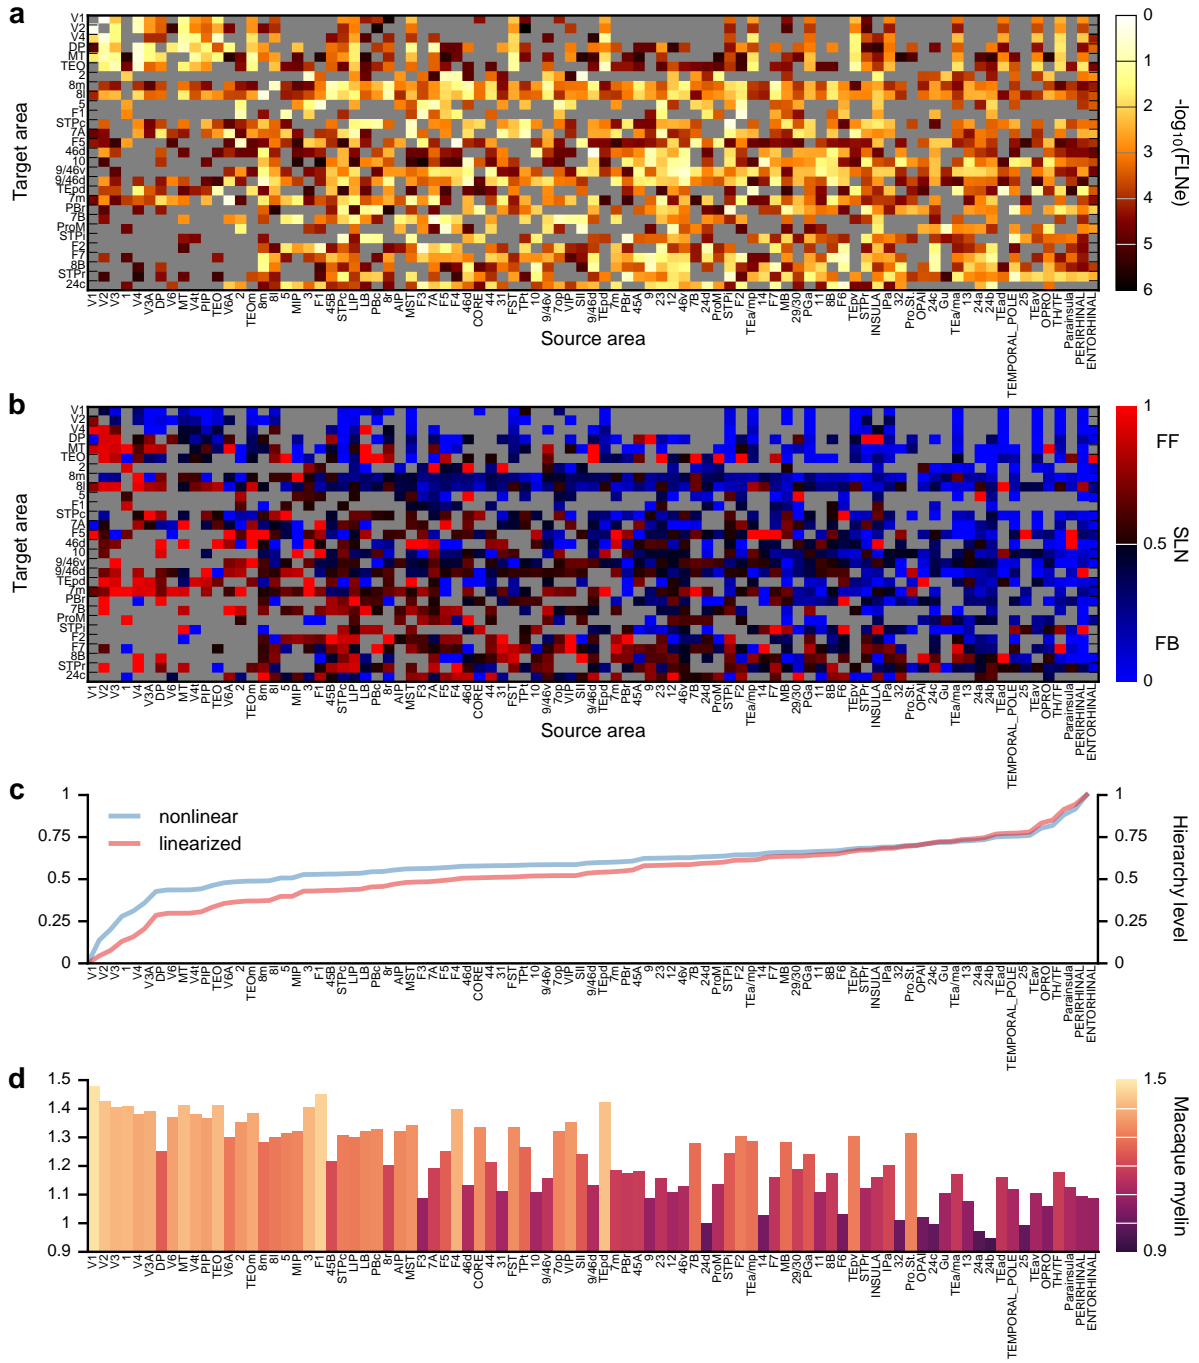

Extended Data Figure 2: [Caption on next page]

**Extended Data Figure 2:** Anatomical cortical hierarchy derived from laminar-specific interareal projections. **a**, Fraction of external labeled neurons (*FLNe*). Target area  $i$  is injected with a retrograde tracer that labels neurons in many source areas; the *FLNe* in source area  $j$  is then defined as the fraction of all external labeled neurons terminating in area  $i$  that originated in source area  $j$ . Each row of the *FLN* matrix is therefore normalized to 1. Measurements which yielded no labeled neurons are marked in grey. **b**, Fraction of supragranular layer neurons (*SLN*), defined as the fraction of neurons in an interareal projection (to target area  $i$  from source area  $j$ ) originating in supragranular layers. An *SLN* of 1 indicates that all labeled projection neurons were of supragranular origin, reflecting a pure feedforward connection; an *SLN* of 0 indicates that all projection neurons originated in deep infragranular layers, reflecting a pure feedback connection. Measurements which yielded no labeled neurons are marked in grey. **c**, Model-estimated hierarchy values for 89 cortical regions. The blue line indicates hierarchy levels estimated by the model after shifting and re-scaling them to lie on the unit interval. The red indicates hierarchy values passed through a logistic function to remove the nonlinearity introduced by the logit link function in the GLM fitting procedure. The monotonicity of this transformation preserves the order of the cortical regions and therefore does not affect the Spearman rank correlations reported in the main text. **d**, Myelin map values for 89 cortical regions.

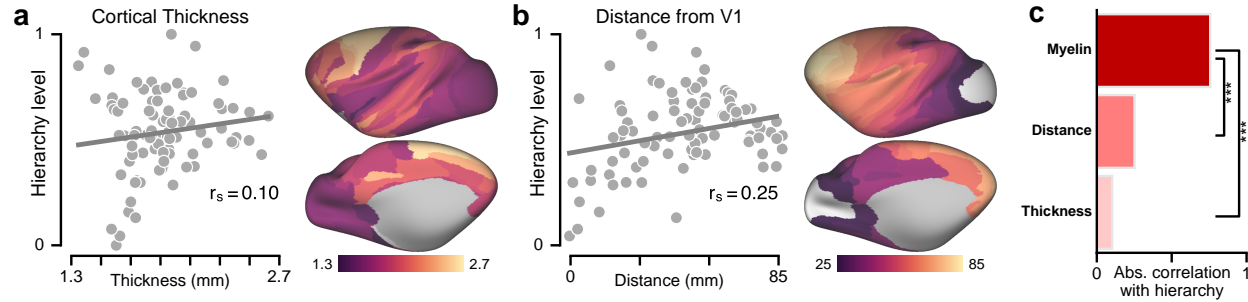

**Extended Data Figure 3:** Hierarchy in macaque cortex is better captured by the myelin map (T1w/T2w) than by other candidate proxy measures derived from structural MRI. **a**, Correlation between hierarchy and cortical thickness. **b**, Correlation between hierarchy and geodesic distance from primary visual cortex (V1). **c**, Comparison of hierarchy correlation values for the myelin map, thickness map, and distance from V1. The myelin map is much more strongly correlated with hierarchy than the other two maps ( $P < 10^{-3}$ ). Statistical significance is calculated by a test of the difference between dependent correlations:  $P < 10^{-1}$ ; \*\*,  $P < 10^{-2}$ ; \*\*\*,  $P < 10^{-3}$ .

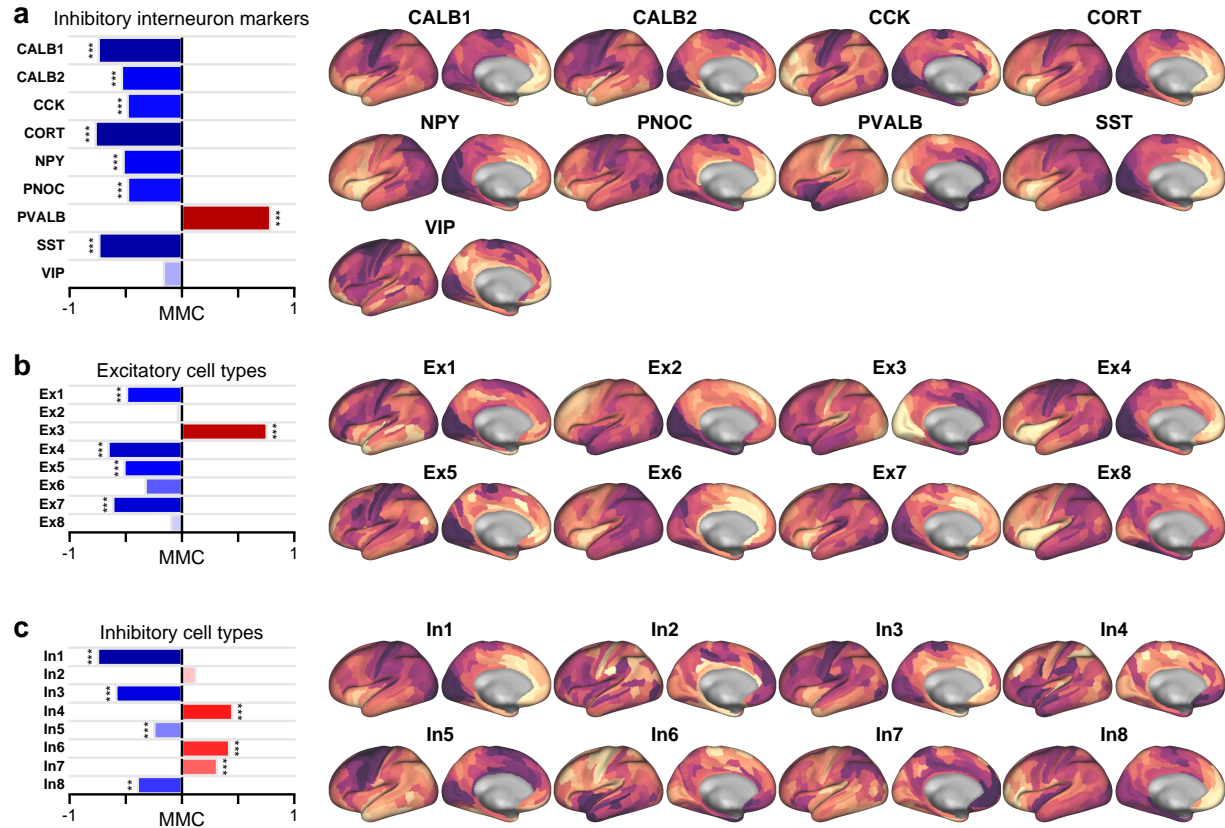

**Extended Data Figure 4:** Expression maps and MMCs for genes that code for markers of distinct inhibitory interneuron cell types, and for weighted profiles characteristic of distinct neuronal cell types derived from single-cell RNA sequencing of human cortical neurons. **a**, Markers for inhibitory interneuron cell types. **b**, Weighted gene sets for excitatory neuronal cell types, derived from single-cell RNA sequencing. **c**, Weighted gene sets for inhibitory neuronal cell types, derived from single-cell RNA sequencing.

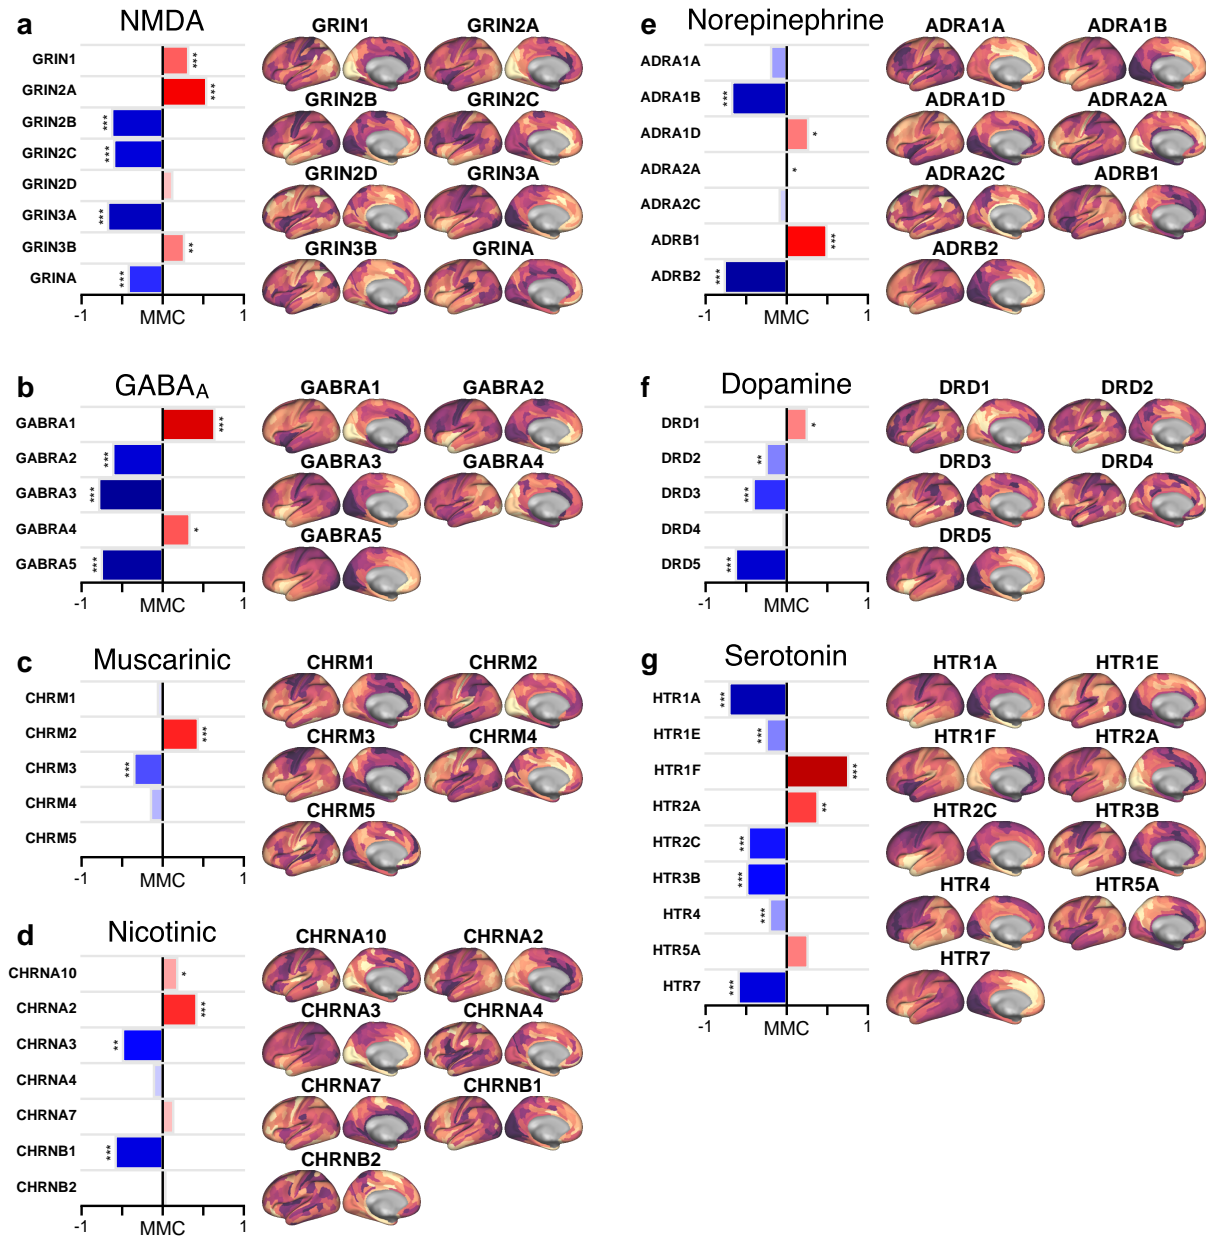

**Extended Data Figure 5:** Expression maps and MMCs for genes coding for synaptic receptor subunits and neuromodulator receptors. **a**, NMDA receptor subunits. **b**, GABA<sub>A</sub> receptor subunits. **c**, Muscarinic acetylcholine receptors (CHRM). **d**, Nicotinic acetylcholine receptors (CHRN). **e**, Norepinephrine receptors (ADR). **f**, Dopamine receptors (DRD). **g**, Serotonin receptors (HTR).

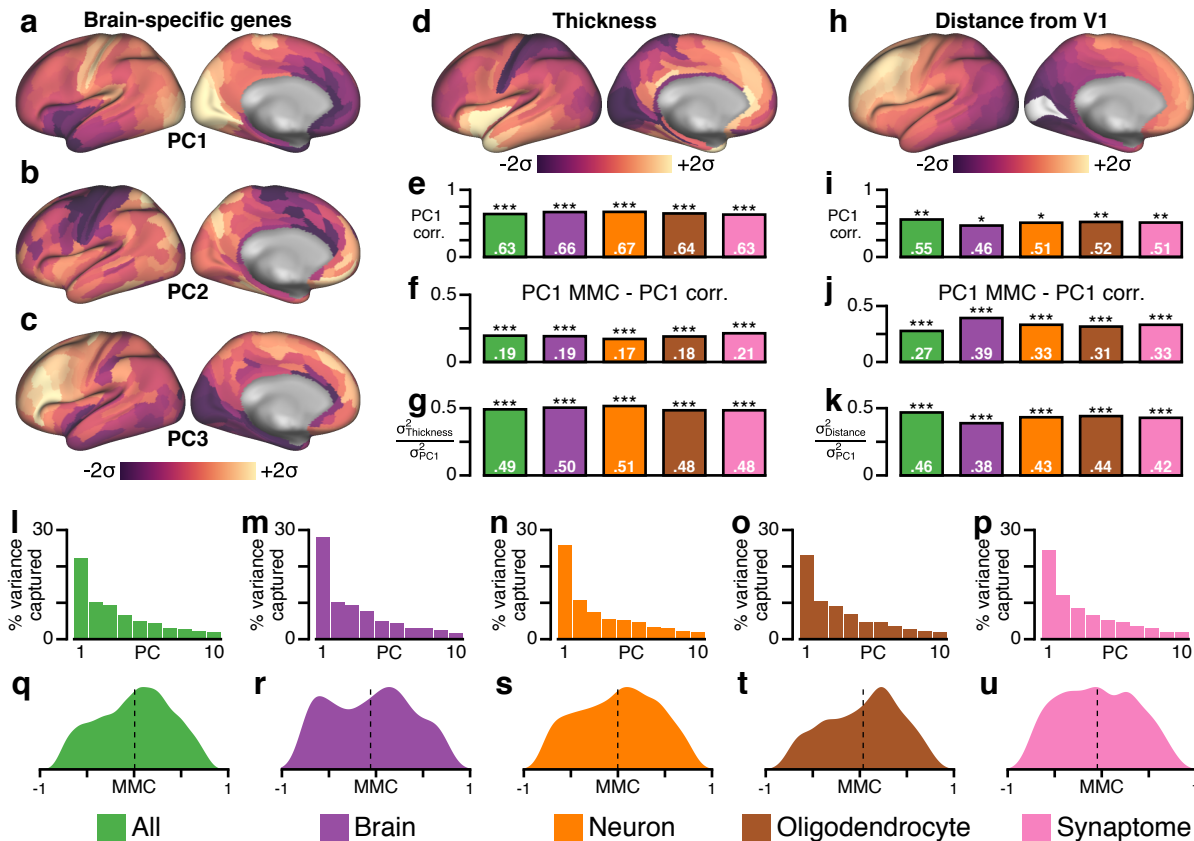

**Extended Data Figure 6:** Principal component analysis (PCA) shows that the dominant mode of gene expression (PC1) is better captured by the myelin map than by other candidate proxies. **a–c**, The first three PCs for brain-specific genes. **d**, The parcellated map of human cortical thickness. **e**, The Spearman rank correlation between the thickness map and PC1 for five gene sets. **f**, The difference in correlation with PC1 between the thickness map and the myelin map, i.e.,  $(r_s(\text{Myelin}, \text{PC1}) - r_s(\text{Thickness}, \text{PC1}))$ . Positive values indicate that the myelin map is more strongly correlated with PC1 than is the thickness map. Statistical significance is calculated by a test of the difference between dependent correlations ( $P < 10^{-1}$ ; \*\*,  $P < 10^{-2}$ ; \*\*\*,  $P < 10^{-3}$ ). **g**, Amount of gene expression variance captured by the thickness map, relative to PC1. **h**, The parcellated map of geodesic distance from primary visual cortical area V1. **i**, The Spearman rank correlation between the V1 distance map and PC1. **j**, The difference in correlation with PC1 between the V1 distance map and the myelin map, i.e.,  $(r_s(\text{Myelin}, \text{PC1}) - r_s(\text{Distance}, \text{PC1}))$ . The myelin map is more strongly correlated with PC1 than is the V1 distance map. **k**, Amount of gene expression variance captured by the thickness map, relative to PC1. **l–p**, Percentage of gene expression variance captured by the top 10 PCs, out of 179 total PCs. For all five gene sets, PC1 captures between 22% and 28% of the variance, which is more than twice the amount captured by PC2. **q–u**, Distribution of myelin map correlations (MMCs) across five gene sets. Dashed lines mark the mean of the distribution. For all five gene sets, the distributions are broad, containing large fractions of strong positive and negative MMCs, and centered near zero, with a range of means ( $-0.06, +0.04$ ).

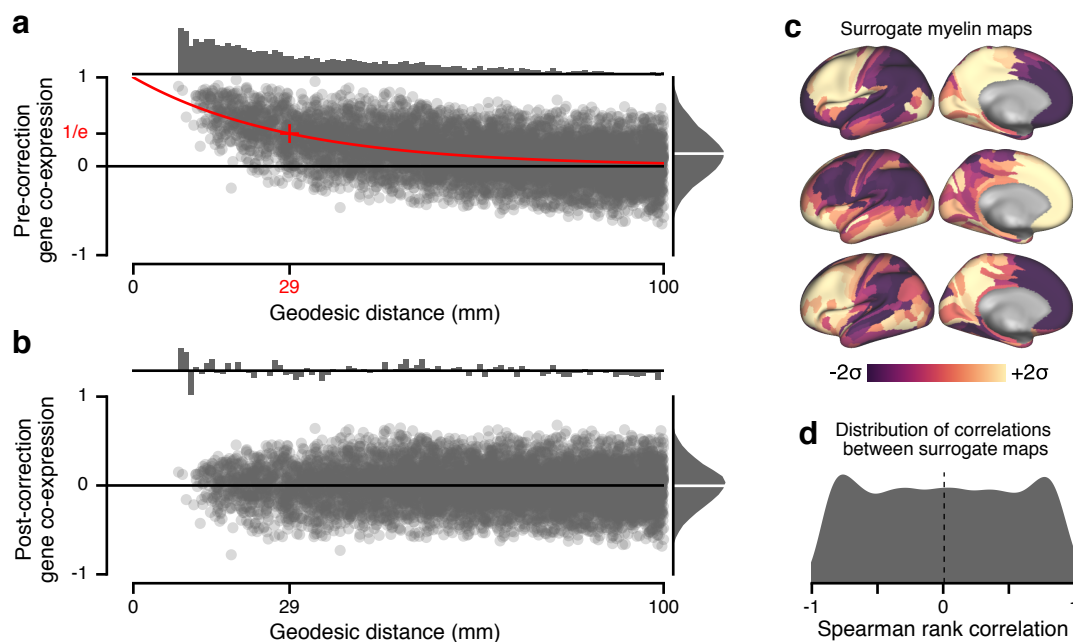

**Extended Data Figure 7:** Autocorrelation structure in gene expression and myelin maps. **a**, Spatial autocorrelation structure in the parcellated cortical gene expression data is well-approximated by a decaying exponential. Gene co-expression is defined as the pairwise Spearman rank correlation between cortical parcels' gene expression values, here for the brain-specific gene set. Proximal cortical parcels exhibit more similar gene expression values compared to distal parcels. All pairs of parcels with geodesic distance less than 100 mm were used to fit the characteristic scale of spatial autocorrelation, illustrated in red (i.e.,  $\exp(-d/d_0)$ ), where  $d$  is geodesic distance and  $d_0 = 29$  mm. Each data point corresponds to the co-expression of a pair of cortical parcels. *Top*: Mean co-expression value as a function of geodesic distance bin. **b**, Gene co-expression values after correcting for spatial autocorrelation structure by subtraction of the fitted exponential decay. After correction, the mean co-expression value is near zero across all geodesic distance bins. **c**, Example randomized surrogate maps with spatial autocorrelation structure matched to the cortical myelin map (see Methods). Autocorrelation structure-preserving surrogate myelin maps are used for nonparametric calculation of statistical significance for PCA results in Figs. 3 and 6. **d**, Distribution of pairwise Spearman rank correlations between pairs of surrogate myelin maps.



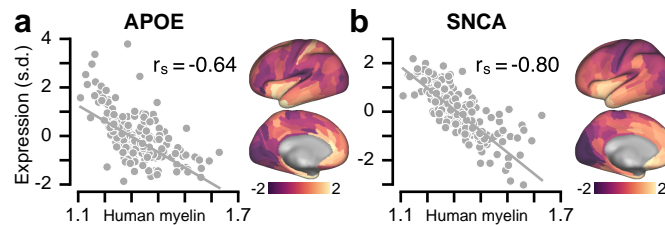

**Extended Data Figure 8:** Two key risk genes for neurodegenerative disorders, *APOE* for Alzheimer's disease and *SNCA* for Parkinson's disease, exhibit strongly negative MMCs, with higher expression levels in association cortex relative to sensory cortex (*APOE*: MMC =  $-0.64$ ,  $P < 10^{-15}$ ; *SNCA*: MMC =  $-0.80$ ,  $P < 10^{-42}$ ). **a**, *APOE* is a leading risk gene for Alzheimer's disease. The  $\epsilon 4$  allele of *APOE* is the largest genetic risk factor for late-onset Alzheimer's disease. **b**, *SNCA* (*PARK1/PARK4*) is a key risk gene for Parkinson's disease. Duplication of *SNCA* is risk factor for familial Parkinson's disease with dominant inheritance. *SNCA* codes for the alpha-synuclein protein which is the primary component of Lewy bodies, which are a biomarker of Parkinson's disease.
